# Supplementary material for: 2,2′:6′,2′′-Terpyridine switches from tridentate to monodentate coordination in a gold(iii) terpy complex upon reaction with sodium azide
Source: Royal Society of Chemistry journal article supplement (doi:10.1039/c9cc04113c), 2019-01-01
Supplement: c9cc04113c1.pdf [file c9cc04113c1.pdf]

**2,2':6',2''-Terpyridine switches from tridentate to monodentate  
coordination in a gold(III) terpy complex upon reaction with sodium azide**

**Kun Peng,<sup>a</sup> Alexandra Friedrich,<sup>a</sup> and Ulrich Schatzschneider<sup>\*a</sup>**

<sup>a</sup>Institut für Anorganische Chemie, Julius-Maximilians-Universität Würzburg,  
Am Hubland, D-97074 Würzburg, Germany.

\* [ulrich.schatzschneider@uni-wuerzburg.de](mailto:ulrich.schatzschneider@uni-wuerzburg.de)

**Supporting Information**

## Experimental Section

**General procedures.** Potassium tetrachloroaurate(III) was obtained from Strem. All other chemicals were purchased from commercial sources and used as received. 2,2':6',2''-Terpyridine was prepared according to a published procedure.<sup>1</sup> **Caution: Azides and azido complexes can violently decompose. Synthesis should only be performed on a very small scale (< 50 mg) and in particular heating of solid compounds avoided, as the gold(III) azido complex exploded upon scratching with a metal spatula.** NMR spectra were recorded at room temperature (298 K) on Bruker Avance 200, 400, and 500 spectrometers (<sup>1</sup>H at 199.93 and 500.13 MHz, respectively; <sup>13</sup>C at 100.68 and 125.76 MHz). Solution chemical shifts  $\delta$  in ppm represent a downfield shift relative to tetramethylsilane (TMS) and were referenced relative to the signal of the solvent.<sup>2</sup> Coupling constants  $J$  are given in Hertz. Peak multiplicities are marked as singlet (s), doublet (d), doublet of doublet (dd), doublet of doublet of doublet (ddd), doublet of triplet (dt), triplet (t), and multiplet (m), respectively. IR spectra of pure solid samples were recorded on a Nicolet 380 FT-IR spectrometer fitted with a smart iTR ATR accessory. The elemental composition of the compounds was determined with an Elementar Vario MICRO cube CHN analyser. Addition of V<sub>2</sub>O<sub>5</sub> was usually required to obtain proper results in the case of the metal complexes.

**Synthesis of [AuCl(terpy- $\kappa^3$ -N<sup>1,1',1''</sup>)]Cl<sub>2</sub>·2H<sub>2</sub>O.** 2,2':6',2''-Terpyridine (116 mg, 0.50 mmol) was dissolved in acetonitrile (15 mL) under nitrogen to afford a clear colourless solution. Then, potassium tetrachloroaurate(III) (126 mg, 0.33 mmol) in water (15 mL) was added dropwise to the colourless solution. After stirring at room temperature for 1 h, the mixture was heated to reflux for 44 h. The resulting solution was cooled to room temperature and filtered. Then, the filtrate was evaporated to dryness to give an amber solid, which was washed with acetone (10 mL) and dried under vacuum for 1 d. Yield: 148 mg (0.28 mmol, 85%). **IR** (ATR):  $\tilde{\nu}$  = 3374 (w), 1605 (s), 1467 (m), 1457 (s), 1349 (m), 1245 (m), 1036 (m), 769 (m), 753 (m) cm<sup>-1</sup>; **<sup>1</sup>H NMR** (199.93 MHz, DMSO-*d*<sub>6</sub>):  $\delta$  = 8.77 (ddd, 2H, <sup>3</sup> $J_{\text{H6,H5/H6''},\text{H5''}}$  = 4.8 Hz, <sup>4</sup> $J_{\text{H6,H4/H6''},\text{H4''}}$  = 1.6 Hz, <sup>5</sup> $J_{\text{H6,H3/H6''},\text{H3''}}$  = 0.7 Hz, H6/H6''), 8.71 (d, 2H, <sup>3</sup> $J_{\text{H3,H4/H3''},\text{H4''}}$  = 8.0 Hz, H3/H3''), 8.49 (d, 2H, <sup>3</sup> $J_{\text{H3'/H5'},\text{H4'}}$  = 7.9 Hz, H3'/H5'), 8.20–8.08 (m, 3H, H4/H4'/H4''), 7.59 (ddd, 2H, <sup>3</sup> $J_{\text{H5,H4/H5''},\text{H4''}}$  = 7.5 Hz, <sup>3</sup> $J_{\text{H5,H6/H5''},\text{H6''}}$  = 4.9 Hz, <sup>4</sup> $J_{\text{H5,H3/H5''},\text{H3''}}$  = 1.1 Hz, H5/H5''); **<sup>13</sup>C NMR** (100.68 MHz, DMSO-*d*<sub>6</sub>):  $\delta$  = 153.87 (C2'/C6'), 153.82 (C2/C2''), 148.48 (C6/C6''), 138.94 (C4/C4''), 138.83 (C4'), 124.94 (C5/C5''), 121.45 (C3/C3'', C3'/C5') ppm; **Elemental analysis** calcd. (%) for C<sub>15</sub>H<sub>11</sub>AuCl<sub>3</sub>N<sub>3</sub>·(H<sub>2</sub>O)<sub>2</sub>: C 31.46, H 2.64, N 7.34; found (%): C 31.11, H 2.64, N 7.30.

**Crystal structure determination.** A crystal suitable for single-crystal X-ray diffraction was selected, coated in perfluoropolyether oil, and mounted on a MiTeGen sample holder. Diffraction data of  $[\text{Au}(\text{N}_3)_3(\text{terpy-}\kappa^1\text{-N}^1)]$  was collected on a Bruker X8-APEX II 4-circle diffractometer with a CCD area detector using multi-layer mirror monochromated  $\text{MoK}\alpha$  radiation. The crystal was cooled using an Oxford Cryostreams low-temperature device. Data was collected at 100 K. The images were processed and corrected for Lorentz-polarization effects and absorption as implemented in the Bruker software packages. The structure was solved using the intrinsic phasing method (ShelXT)<sup>3</sup> and Fourier expansion techniques. All non-hydrogen atoms were refined in anisotropic approximation with hydrogen atoms "riding" in idealized positions, by full-matrix least squares against  $F^2$  of all data, using the ShelXL software.<sup>4</sup> Crystal data and experimental details are listed in Table S1. Crystallographic data have been deposited with the Cambridge Crystallographic Data Center as supplementary publication no. CCDC-1918121. These data can be obtained free of charge from The Cambridge Crystallographic Data Centre *via* [www.ccdc.cam.ac.uk/data\\_request/cif](http://www.ccdc.cam.ac.uk/data_request/cif)

**DFT calculations.** Density functional theory calculations were carried out on the Linux cluster of the Leibniz-Rechenzentrum (LRZ) in Munich with ORCA version 4.0.0.2<sup>5</sup> using the BP86 functional, a ZORA-def2-TZVP basis set on the light atoms and SARC-ZORA-TZVP on gold<sup>6</sup> together with AutoAux, the tightscf, grid4, and DIISMaxEq 15 options, and the CPCM solvation model with water or acetone as the solvent for geometry optimizations and subsequent calculation of vibrational frequencies to characterize the structures obtained as minima by inspection for absence of imaginary modes. Graphics were created with gOpenmol.

## References

- 1 D. L. Jameson and L. E. Guise, *Tetrahedron Lett.*, 1991, **32**, 1999;  
D. L. Jameson, L. E. Guise, C. A. Bessel and K. Takeuchi, *Inorg. Synth.*, 1998, **32**, 46.
- 2 G. R. Fulmer, A. J. M. Miller, N. H. Sherden, H. E. Gottlieb, A. Nudelman, B. M. Stoltz, J.E. Bercaw and K. I. Goldberg, *Organometallics*, 2010, **29**, 2176.
- 3 G. M. Sheldrick, *Acta Crystallogr. A*, 2015, **A71**, 3.
- 4 G. M. Sheldrick, *Acta Crystallogr. A*, 2008, **A64**, 112.
- 5 F. Neese, *WIREs Comput. Mol. Sci.*, 2011, **2**, 73.
- 6 F. Weigend and R. Ahlrichs, *Phys. Chem. Chem. Phys.*, 2005, **7**, 3297.

**Table S1.** Single-crystal X-ray diffraction data and structure refinement of [Au(N<sub>3</sub>)(terpy-κ<sup>1</sup>-N<sup>1</sup>)].

| CCDC                                                           | 1918121                                           |
|----------------------------------------------------------------|---------------------------------------------------|
| Formula                                                        | C <sub>15</sub> H <sub>11</sub> AuN <sub>12</sub> |
| <i>M</i> <sub>r</sub> (g·mol <sup>-1</sup> )                   | 556.32                                            |
| $\rho_x$ (g·cm <sup>-3</sup> )                                 | 2.171                                             |
| <i>F</i> (000)                                                 | 2112                                              |
| <i>T</i> (K)                                                   | 100(2)                                            |
| Radiation, $\lambda$ (Å)                                       | MoK $\alpha$ 0.71073                              |
| $\mu$ (mm <sup>-1</sup> )                                      | 8.674                                             |
| Crystal size (mm)                                              | 0.32 × 0.33 × 0.60                                |
| Crystal colour, habit                                          | orange-red block                                  |
| Crystal system                                                 | monoclinic                                        |
| Space group                                                    | <i>C</i> 2/ <i>c</i>                              |
| <i>a</i> (Å)                                                   | 16.174(7)                                         |
| <i>b</i> (Å)                                                   | 10.772(5)                                         |
| <i>c</i> (Å)                                                   | 19.565(8)                                         |
| $\alpha$ (°)                                                   | 90                                                |
| $\beta$ (°)                                                    | 92.84(2)                                          |
| $\gamma$ (°)                                                   | 90                                                |
| <i>V</i> (Å <sup>3</sup> )                                     | 3405(2)                                           |
| <i>Z</i>                                                       | 8                                                 |
| $\theta$ range (°)                                             | 2.084–26.022                                      |
| Reflections collected                                          | 19200                                             |
| Unique reflections                                             | 3350                                              |
| Parameters / restraints                                        | 253 / 0                                           |
| Goof on <i>F</i> <sup>2</sup>                                  | 1.190                                             |
| <i>R</i> <sub>1</sub> indices [ <i>I</i> > 2σ( <i>I</i> )]     | 0.0252                                            |
| <i>wR</i> <sup>2</sup> (all data)                              | 0.0607                                            |
| Maximum/minimum residual electron density (e·Å <sup>-3</sup> ) | 1.317 / -1.380                                    |

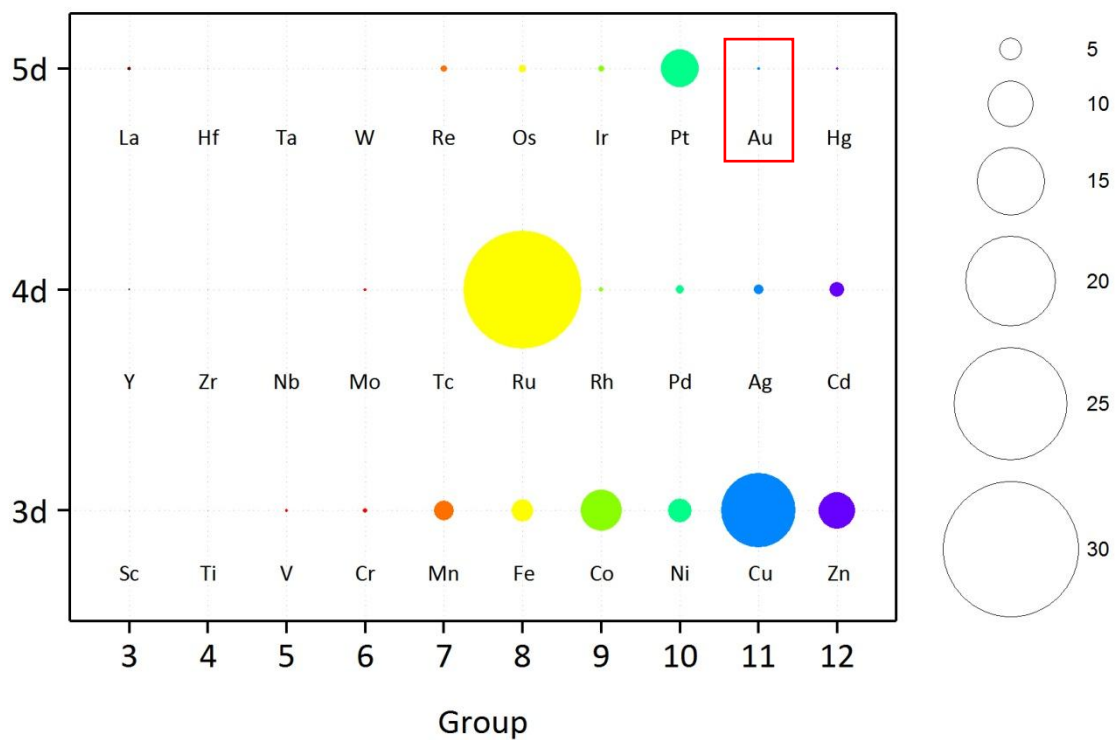

**Figure S1.** Bubble plot showing the relative abundance (in %) of transition metal terpyridine complexes characterized by X-ray structure analysis across the periodic table. Data was obtained from the Cambridge Structural Database (CSD). The red box highlights the gold complexes in the focus of this study.

## Spectroscopic data for $[\text{AuCl}(\text{terpy-}\kappa^3\text{-}N^{1,1',1''})]\text{Cl}_2\cdot 2\text{H}_2\text{O}$

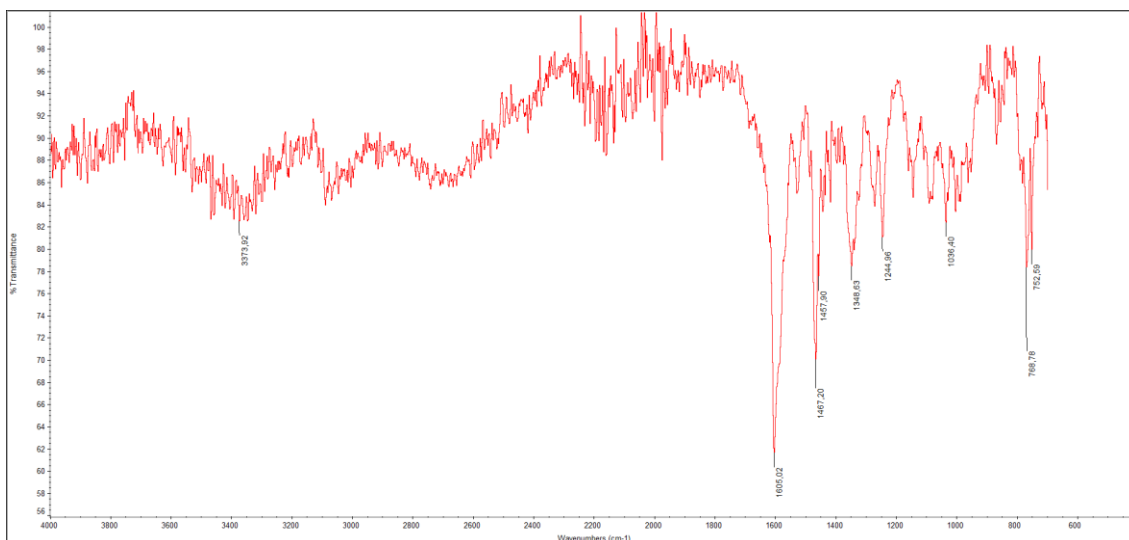

Figure S2. ATR IR spectrum of  $[\text{AuCl}(\text{terpy-}\kappa^3\text{-}N^{1,1',1''})]\text{Cl}_2\cdot 2\text{H}_2\text{O}$

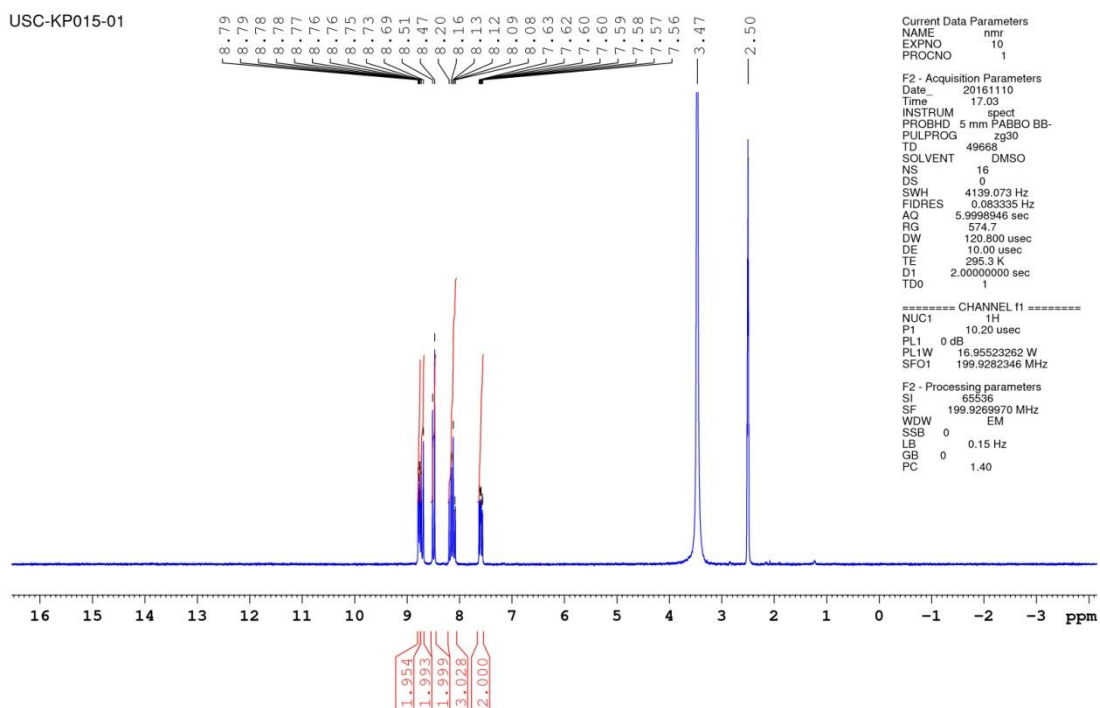

Figure S3. 199.93 MHz  $^1\text{H}$  NMR spectrum of  $[\text{AuCl}(\text{terpy-}\kappa^3\text{-}N^{1,1',1''})]\text{Cl}_2\cdot 2\text{H}_2\text{O}$  in  $\text{DMSO-}d_6$  (full range).

USC-KP015-01

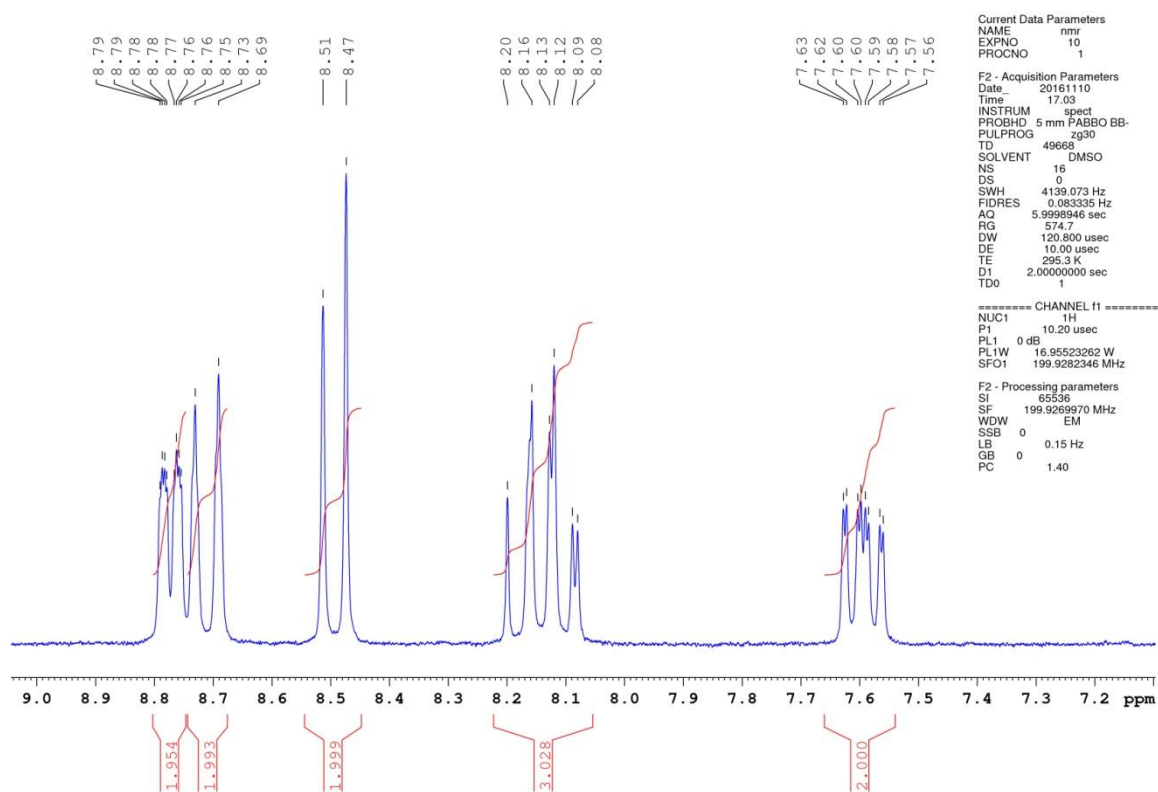

**Figure S4.** 199.93 MHz  $^1\text{H}$  NMR spectrum of  $[\text{AuCl}(\text{terpy-}\kappa^3\text{-N}^{1,1',1''})]\text{C}_{12}\cdot 2\text{H}_2\text{O}$  in  $\text{DMSO-}d_6$  (aromatic region only).

USC-KP015-01

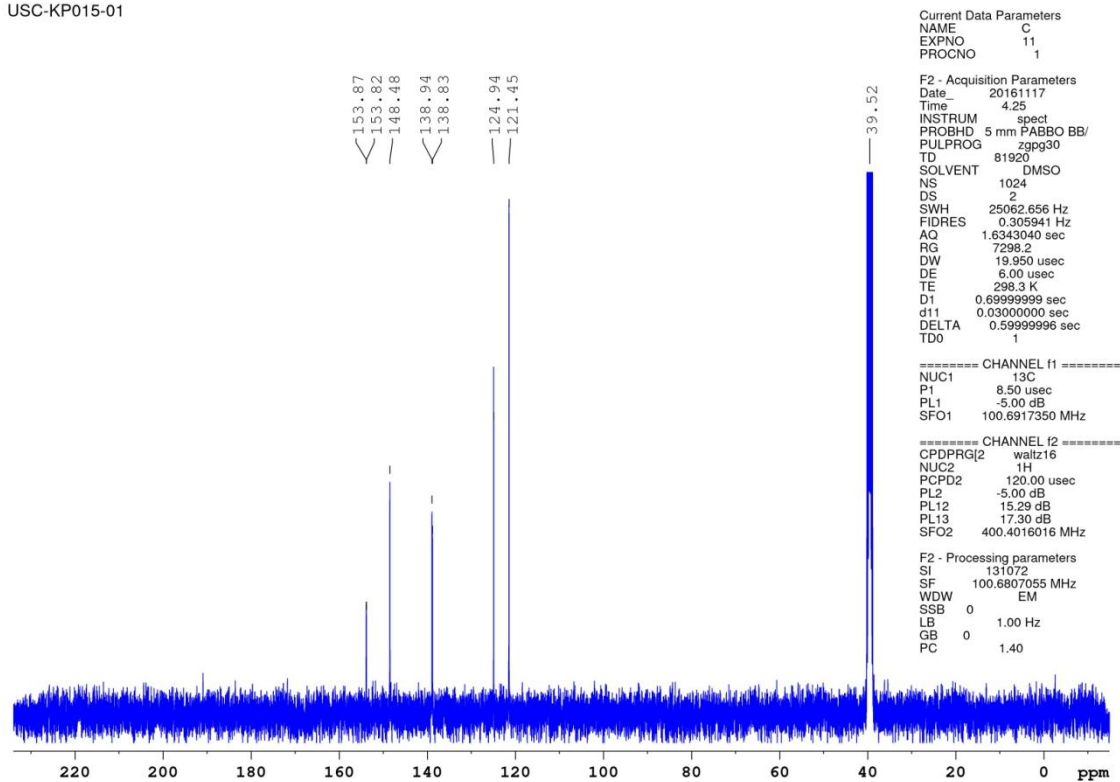

**Figure S5.** 100.68 MHz  $^{13}\text{C}$  NMR spectrum of  $[\text{AuCl}(\text{terpy-}\kappa^3\text{-N}^{1,1',1''})]\text{C}_{12}\cdot 2\text{H}_2\text{O}$  in  $\text{DMSO-}d_6$  (full range).

USC-KP015-01

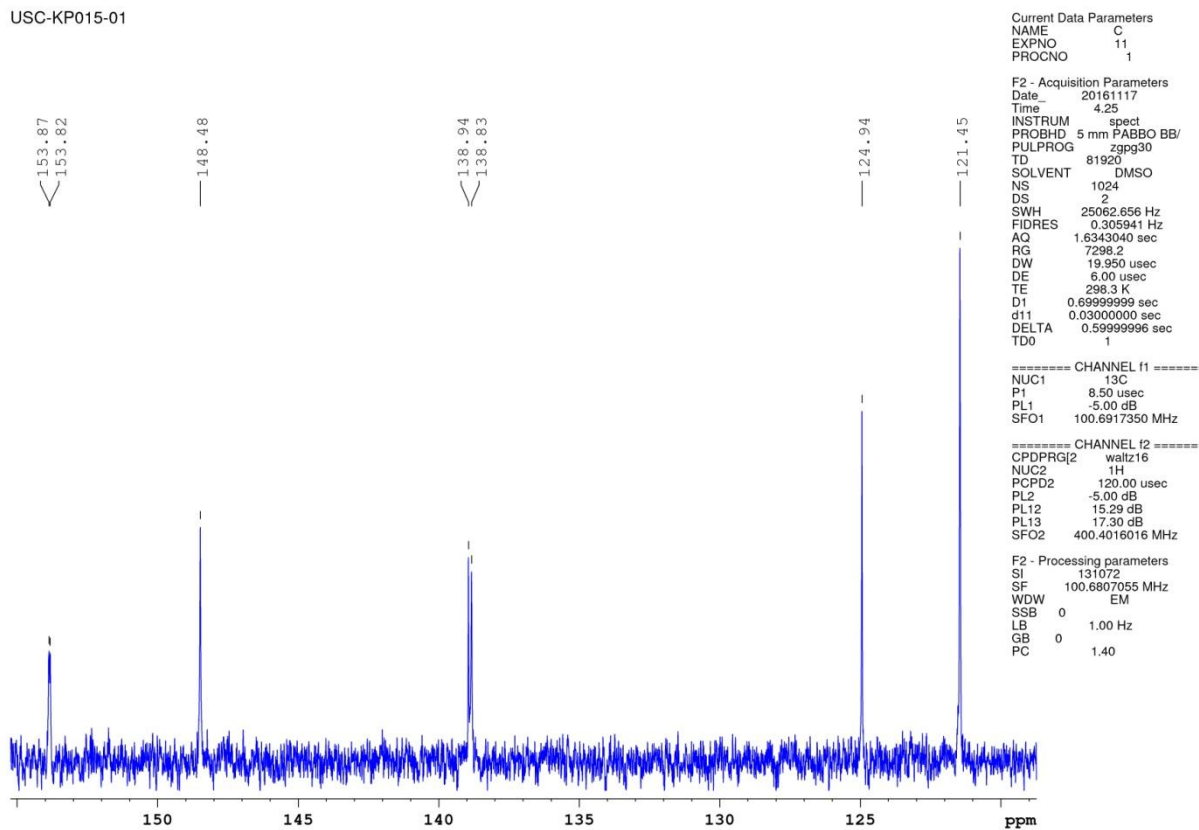

**Figure S6.** 100.68 MHz  $^{13}\text{C}$  NMR spectrum of  $[\text{AuCl}(\text{terpy-}\kappa^3\text{-}N^{1,1',1''})]\text{Cl}_2\cdot 2\text{H}_2\text{O}$  in  $\text{DMSO-}d_6$  (aromatic region only).



## Spectroscopic data for $[\text{Au}(\text{N}_3)_3(\text{terpy-}\kappa^1\text{-N}^1)]$

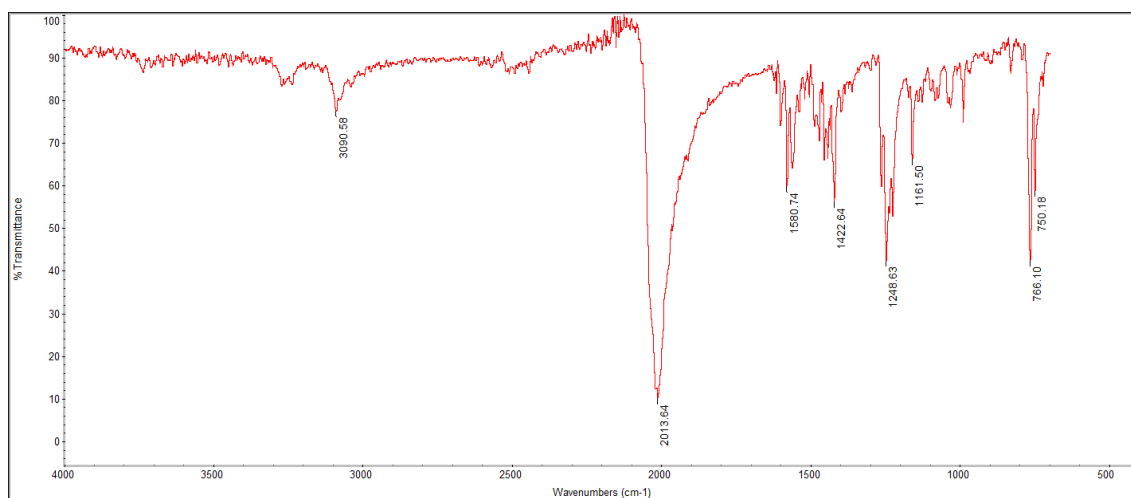

**Figure S7.** ATR IR spectrum of  $[\text{Au}(\text{N}_3)_3(\text{terpy-}\kappa^1\text{-N}^1)]$

USC-KP016-33

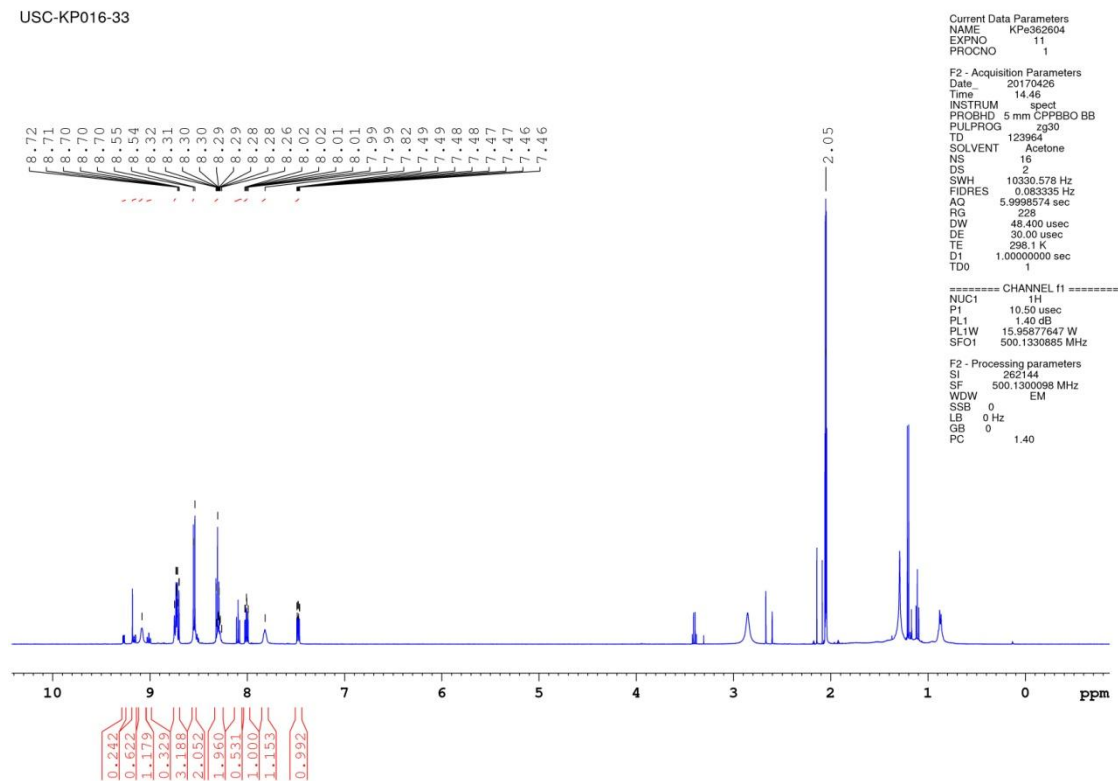

**Figure S8.** 500.13 MHz  $^1\text{H}$  NMR spectrum of  $[\text{Au}(\text{N}_3)_3(\text{terpy-}\kappa^1\text{-N}^1)]$  in acetone- $d_6$  (full range).

USC-KP016-33

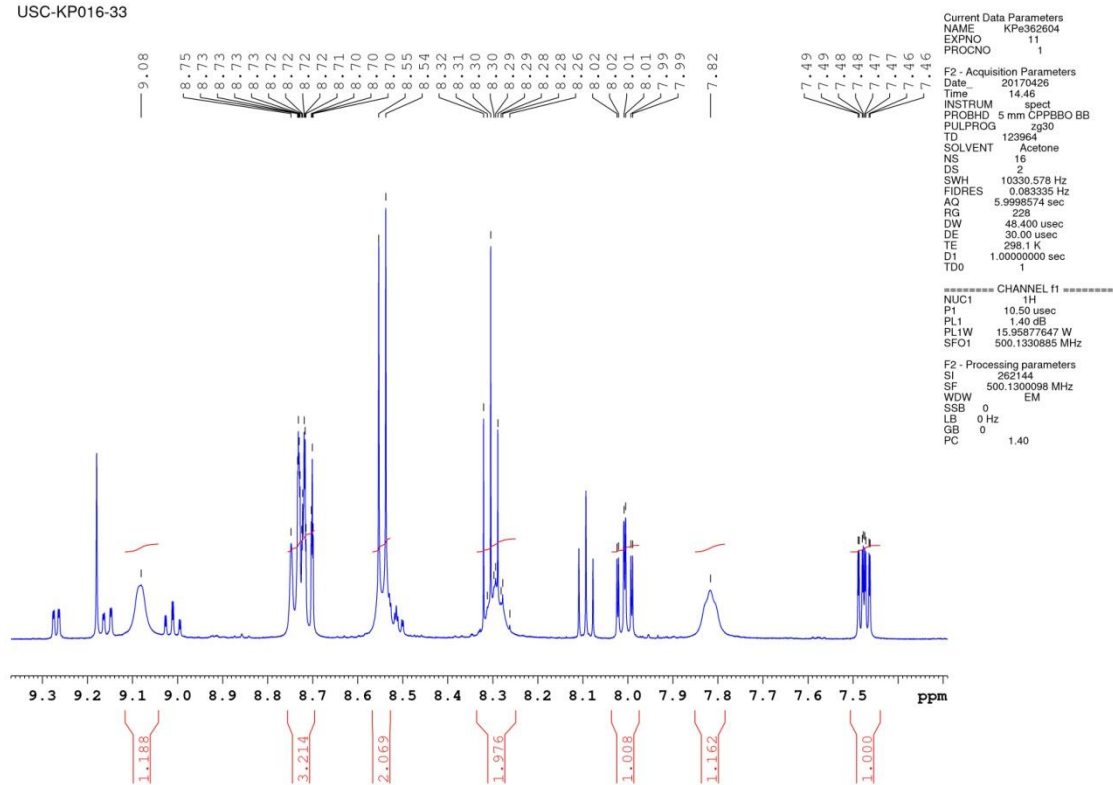

**Figure S9.** 500.13 MHz  $^1\text{H}$  NMR spectrum of  $[\text{Au}(\text{N}_3)_3(\text{terpy-}\kappa^1\text{-N}^1)]$  in acetone- $d_6$  (aromatic region, major species).

USC-KP016-33

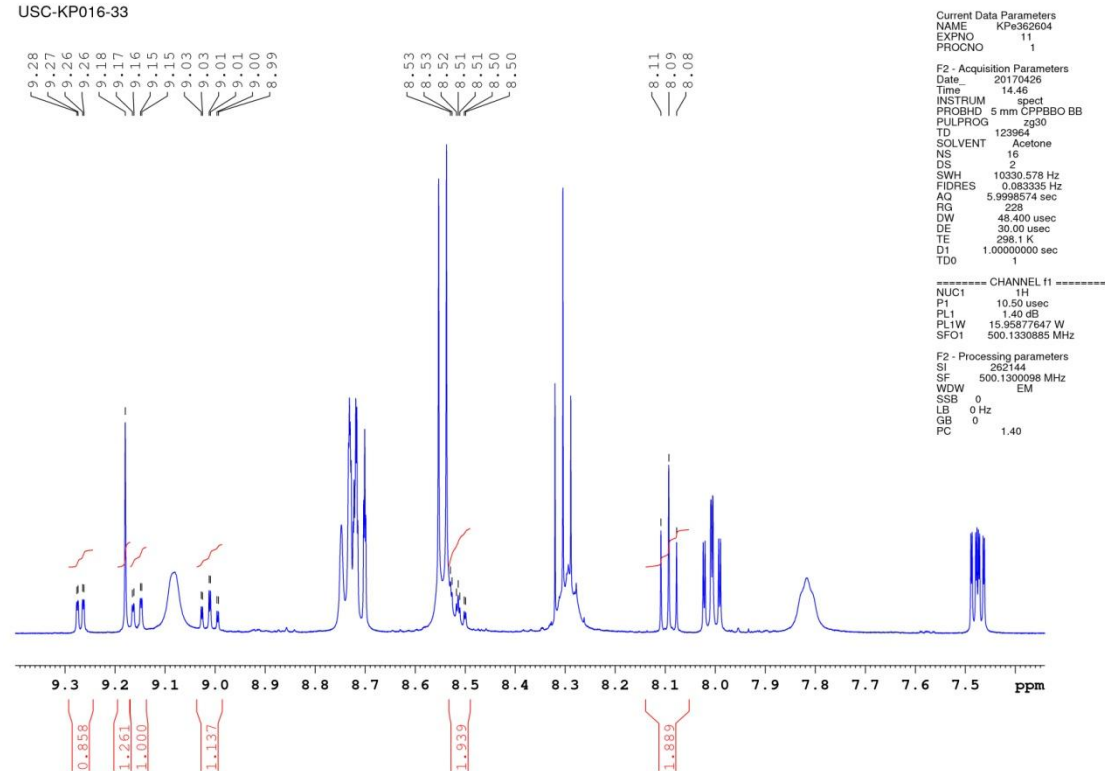

**Figure S10.** 500.13 MHz  $^1\text{H}$  NMR spectrum of  $[\text{Au}(\text{N}_3)_3(\text{terpy-}\kappa^1\text{-N}^1)]$  in acetone- $d_6$  (aromatic region, minor species).

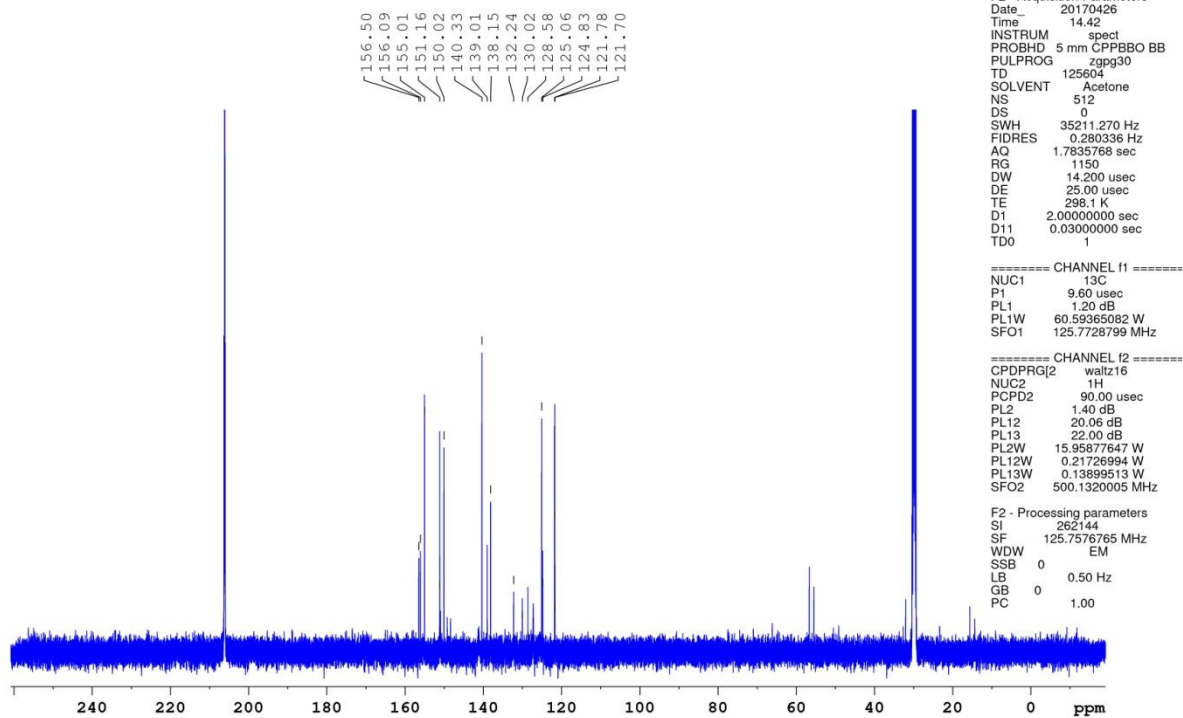

**Figure S11.** 125.76 MHz  $^{13}\text{C}$  NMR spectrum of  $[\text{Au}(\text{N}_3)_3(\text{terpy-}\kappa^1\text{-N}^1)]$  in acetone- $d_6$  (full range).

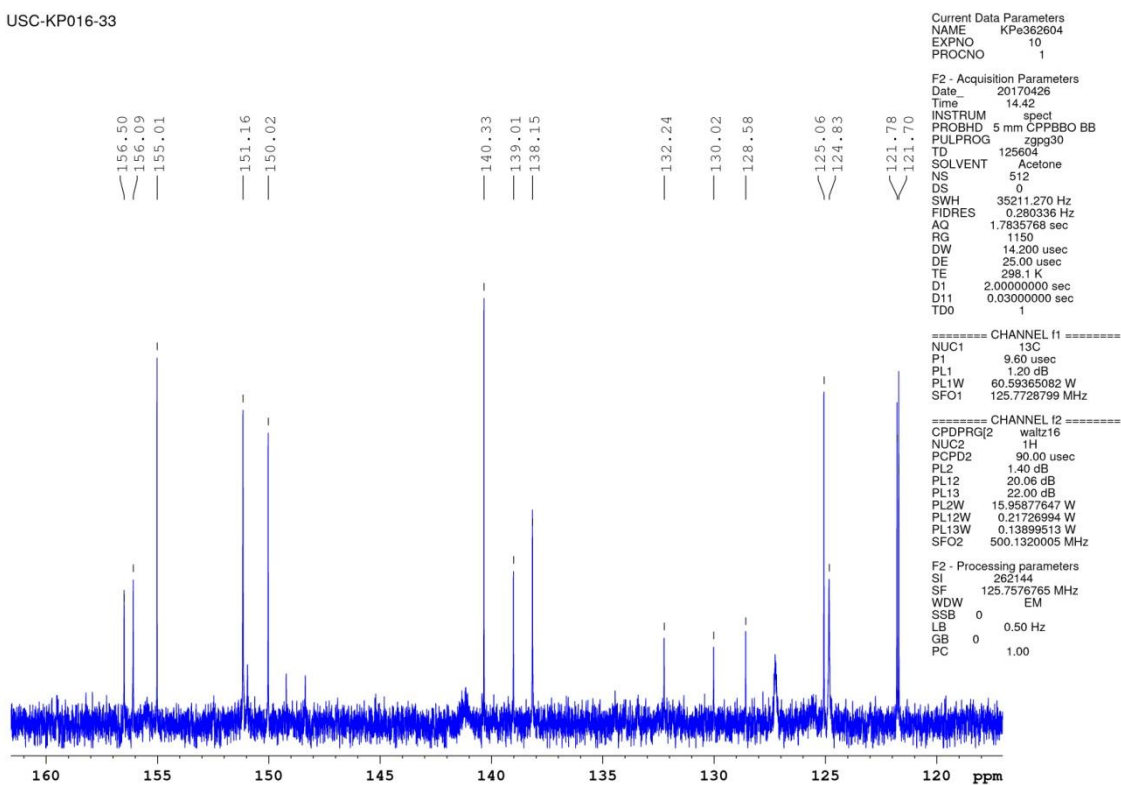

**Figure S12.** 125.76 MHz  $^{13}\text{C}$  NMR spectrum of  $[\text{Au}(\text{N}_3)_3(\text{terpy-}\kappa^1\text{-N}^1)]$  in acetone- $d_6$  (aromatic region, major species).

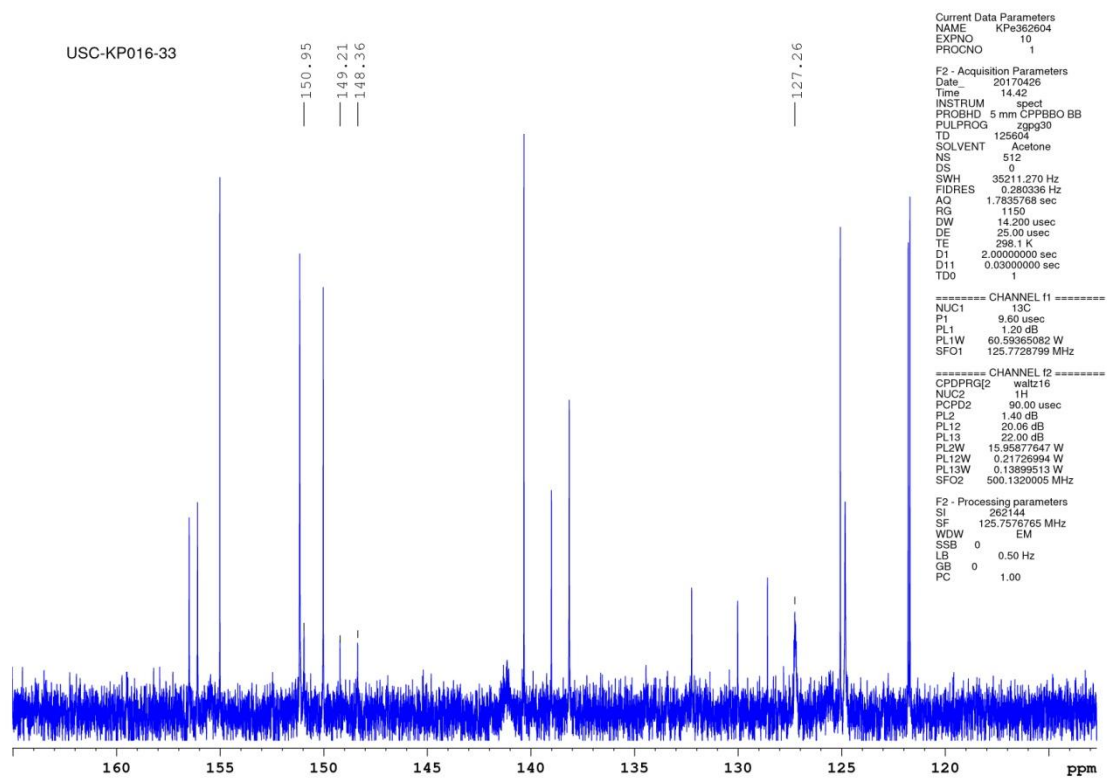

**Figure S13.** 125.76 MHz  $^{13}\text{C}$  NMR spectrum of  $[\text{Au}(\text{N}_3)_3(\text{terpy-}\kappa^1\text{-N}^1)]$  in acetone- $d_6$  (aromatic region, minor species).
